# Supplementary material for: Assimilation of Digital Health by Family Physicians in Canada
Source: Research Square preprint supplement (doi:10.21203/rs.3.rs-134428/v1), 2021-01-07
Supplement: Supplementary file 1 [file 0631ae2ea1709e74414abf65.docx]

**Appendix II. SEM procedure**

Submission title: Assimilation of Digital Health by Family Physicians in Canada

Author list: Guy Paré, Marie-Pascale Pomey, Louis Raymond and Janine Badr

In this study, whereas two research constructs are modeled as being “reflective” (routinization of digital health, infusion of digital health), the three other constructs are modeled as being “formative” (physician characteristics, physician motivations, medical practice characteristics) given their composite and multidimensional nature (see Figure 2). The first step in the data analysis consisted of simultaneously estimating the measurement and theoretical models using the PLS-SEM technique. The metric properties of the five research constructs were thus assessed within the context of the theoretical model. As the standard reliability and validity criteria applicable to reflective constructs do not apply to formative constructs, one must first confirm the absence of any multicollinearity among each formative construct’s indicators. This involves using the variance inflation factor (VIF) statistic, the rule being that the VIF must not be greater than 3.3 in the case of the three formative constructs. As shown in Table 1, the VIF value for all the formative indicators is below this threshold, confirming the absence of any multicollinearity.

Once the validity of the formative measures has been assessed, the reliability, predictive validity, and discriminant validity of the two reflective constructs must then be evaluated. As presented in Table 2, the composite reliability coefficient values are above the 0.70 threshold, confirming the internal consistency of these constructs. The results also provide evidence of the convergent validity of the reflective construct because their average variance extracted (AVE) is above the 0.50 threshold.

**Table 2. Reliability and validity of the research constructs**

| **Research Constructs** | **c.r.**a | **AVE**b | **Correlation matrix**  1. 2. 3. 4. 5. |
| --- | --- | --- | --- |
| 1. Digital Health Routinization | 0.80 | 0.58 | 0.76c |
| 2. Digital Health Infusion | 0.76 | 0.53 | 0.35 0.73 |
| 3. Physician Characteristics | - | - | 0.55 0.22 - |
| 4. Physician Motivations | - | - | 0.47 0.40 0.41 - |
| 5. Medical Practice Characteristics | - | - | 0.14 0.26 0.09 0.24 - |

acomposite reliability of a reflective construct = (Σλi)2/((Σλi)2+Σ(1-λi2))

baverage variance extracted (by a construct from its reflective indicators) = Σλi2/n

cdiagonal: (AVE)1/2 = (Σλi2/n)1/2 [not applicable to formative constructs]

subdiagonals: correlation = (shared variance between two constructs)1/2

The last property to be verified is discriminant validity, showing the extent to which each research construct, as measured, is unique and different from the other four. Such validity is confirmed for the three formative constructs by the fact that each construct shares less than 50% variance with any other construct (inter-construct correlation less than 0.70), as shown in Table 2. For the two reflective constructs, discriminant validity is verified when the variance shared by each with any other construct is less than its AVE, and this is also confirmed in this table.
