# Supplementary material for: Assimilation of Digital Health by Family Physicians in Canada
Source: Research Square preprint supplement (doi:10.21203/rs.3.rs-134428/v1), 2021-01-07
Supplement: Supplementary file 2 [file 74bb698db2b2519fd42aa1bc.docx]

**Appendix I. Survey instrument**

Submission title: Assimilation of Digital Health by Family Physicians in Canada

Author list: Guy Paré, Marie-Pascale Pomey, Louis Raymond and Janine Badr

Independent constructs

During a typical week, how many of your patients are asking you... (none; <25%; >25 and <=50; >50% and <75%; >=75% of my patients)

- To recommend a website for reliable medical information?
- To recommend a medical device connected to the Internet (e.g. blood pressure monitor, glucometer) that will allow them to monitor their physiological data?
- To recommend a smart or digital device for monitoring their lifestyle habits (e.g. a smart bracelet, connected toothbrush, connected pedometer)?
- If it is possible to communicate with you by email or text message (SMS)?
- To share vital signs, symptoms and other physiological data that they have collected using mobile apps or connected objects?
- If it is possible to make an appointment online for a consultation with you?
- If it is possible to make an online consultation (teleconsultation) instead of a face-to-face consultation?

During a typical week, how many of your patients... (none; <25%; >25 and <=50; >50% and <75%; >=75% of my patients)

- Share medical information they found on the web?
- Are better prepared for their consultation by using the information found on the web?
- Believe that the perceived health problem justifies a medical consultation because of the information they found on the web?
- Explore treatment modalities, medication or natural medicine options that they have found on the web (other than those prescribed or that may be prescribed)?
- Inquire about or question the diagnosis, treatment or use of a drug after having consulted information available on the web?
- Seem more anxious and need to be reassured because of the information they found on the web?
- Make incorrect diagnoses (misdiagnoses) after consulting information available on the web?

Do you ever consult data that your patients collect using mobile apps or connected devices? (Y/N)

- If Yes: how often do you consult this type of data? (1= very rarely to 5 = very often)
- If Yes: in terms of importance, what benefits do you associate with consulting this type of data for yourself? (1= not important at all to 5 = very important)
  - Allows better clinical follow-up of my patients
  - Allows better communication with my patients
  - Supports better clinical decision-making
  - Allows better use of my time during consultations (effectiveness)
  - Allows a discussion with my patient of what goals to achieve (e.g., blood glucose level, blood pressure)
- If No: identify the 3 main reasons why you do not consult this type of data.
  - Most of my patients do not collect this type of data
  - Lack of time
  - Unnecessary amount of irrelevant data leading to a loss of time
  - Lack of certainty about the reliability of this type of data
  - No interoperability with my own computer systems (e.g., EMR system)
  - Lack of knowledge about these mobile applications and devices
  - Lack of personal interest in this type of technology
  - Absence of remuneration for analyzing this type of data

Do you use your smartphone or digital tablet for professional purposes? (Y/N)

In a typical week, how often do you consult the following information by searching the web or using a mobile app? (1=never to 5 = very often)

- Pharmaceutical advisers or prescribers
- Medical calculators
- Medical guidelines (e.g. INESSS, CMQ)
- Decision-making aids for differential diagnosis
- Tools for diagnosis, decision making and prescription
- Nutritional guidelines
- Patient counseling information
- Anatomical charts

Do you use the following online sources of medical information in your practice? (Y/N)

- Mobile medical apps (e.g., Epocrates, Diagnosaurus, MedCalX, Eponyme, BMJ Best Practice, RxTx, etc.)
- Specialized blogs (e.g., Well, WebMD Doctors, Doctor Weighs in, Docs Opinion)
- Microblogs (e.g., Twitter)
- Social media (e.g., Facebook)
- Medical Wikis (e.g., AskDrWiki, EyeWiki, WikiDoc, Wikilectures)

In a typical week, how often do you: (1=never to 5 = very often)

- Exchange, via unsecured email (e.g. Outlook), text messaging (SMS) or social media (e.g., Messenger), medical information or photos about your patients with other physicians?
- Exchange, via secure email (e.g., PetalMD), medical information or photos about your patients with other physicians?
- Exchange, via unsecured email, text messaging (SMS) or social media (e.g., Messenger), medical information or photos with your patients?
- Conduct online consultations with your patients using non-secure communication software (e.g., Skype, Face Time)?
- Consult online with your patients using secure communication software (e.g., Reacts)?
- Conduct online consultations for your patients with specialist physicians using secure communication software (e.g., Reacts)?

Do you feel the need to have access to training that would address one or more of the following aspects? (Check all that apply.) (Y/N)

- Know the mobile apps and smart devices that are most useful in family medicine
- Know how to effectively integrate and use these applications and devices in my daily practice
- Receive training on the legal and ethical issues associated with digital health
- Acquire basic knowledge of computer data security
- Know how to integrate data from mobile apps and smart devices into your EMR system
- Learn to develop a mobile app that would be useful in family medicine
- You do not need any special training in relation to digital health

Do you welcome the use of artificial intelligence (AI) in support of medical diagnosis?

(Y/N/not sure)

Independent constructs

In which primary setting do you currently practice family medicine? (Check one box only.)

- Medical clinic not affiliated with a GMF
- GMF
- GMFU
- CLSC
- Hospital
- Other (specify)

In which territory is your main workplace located? (list of all 16 administrative territories in Quebec)

How many active patients do you currently have as a family physician?

How many of your patients have one or more diagnoses of chronic diseases?

Have you developed a practice that is oriented towards the treatment of the following chronic diseases? (Check all that apply.) (Y/N)

- Diabetes
- Hypertension
- Heart failure
- Obesity
- Asthma
- Chronic Obstructive Pulmonary Disease (COPD)
- Other (specify):

How many medical consultations do you provide on average during a typical workday?

What main language do you use when communicating with your patients? (French/English/other)

Do you use an electronic medical record (EMR) system? (Y/N)

What age group do you belong to?

- 29 or less
- 30 to 39
- 40 to 49
- 50 to 59
- 60 to 70
- 70 or older

What is your gender?

- Female
- Male
- Prefer not to answer

How many years have you been practicing family medicine in Quebec?

Do you hold a teaching position in family medicine at a university faculty? (Y/N)

In relation to your own health, which of the scenarios below best fits your personal situation? (Check only one.)

- I do not measure on a regular basis one or more aspects of my health or well-being (e.g., physical activity, nutrition, sleep, weight, mood, diabetes, blood pressure, cardiovascular health, taking medication, etc.).
- I measure one or more aspects of my health or well-being on a regular basis using tools such as a personal health book, a notebook or a Word or Excel file.
- I do not measure any aspects of my health or well-being on a regular basis
